# Supplementary material
Source: publisher figshare collection journal article supplement (https://frontiersin.figshare.com/ndownloader/files/12418934)
Supplement: Supplementary file 1 [file 12418934]

Definiteness: Supplementary Materials

Model 1: Mixed effects model for plurals. Effects for factors Definiteness (Definite/Indefinite) Plurals x Group (Adults/Children) (random effect structure: participants)

|  | ***Estimate*** | ***Standard error*** | ***z-value*** | ***p*** |
| --- | --- | --- | --- | --- |
| Intercept (*des*) | -2.355 | 1.627 | -1.447 | 0.148 |
| Def - *les* | -3.252 | 0.955 | -3.407 | < 0. 001 *** |
| Group - children | -1.657 | 1.609 | -1.030 | 0. 303 |
| Def - *les* * Group - children | 2.409 | 1.026 | 2.348 | 0. 019 * |

*Log Likelihood: -160.9; Number of observations: 492*

Model 2: Analysis of deviance table (Type III Wald Chi-square tests) for plurals. Effects for factors Definiteness (Definite/Indefinite) Plurals x Group (Adults/Children) (random effect structure: participants)

|  | ***Chi-square*** | ***Df*** | ***p*** |
| --- | --- | --- | --- |
| Intercept | 2.095 | 1 | 0.148 |
| Def | 11.604 | 1 | < 0. 001 *** |
| Group | 1.060 | 1 | 0. 303 |
| Def*Group | 5.515 | 1 | 0. 019 * |

Model 3: Logistic regression effects model for plurals in the children group. Effects for factors Definiteness (Definite/Indefinite) Plurals x Age (centered continuous variable)

|  | ***Estimate*** | ***Standard error*** | ***z-value*** | ***p*** |
| --- | --- | --- | --- | --- |
| Intercept (*des*) | -2.127 | 0.486 | -4.379 | < 0. 001 *** |
| Def - *les* | -2.772 | 0.933 | -2.973 | 0. 003 ** |
| Age | -0.268 | 0.141 | -1.906 | 0. 057 |
| Def - *les* * Age | -0.665 | 0.244 | -2.721 | 0. 007 ** |

Model 4: Analysis of deviance table (Type III Wald Chi-square tests) for plurals. . Effects for factors Definiteness (Definite/Indefinite) Plurals x Age (centered continuous variable)

|  | ***Chi-square*** | ***Df*** | ***p*** |
| --- | --- | --- | --- |
| Def | 10.059 | 1 | 0. 002 ** |
| Group | 3.690 | 1 | 0. 055 . |
| Def*Group | 7.997 | 1 | 0. 005 ** |

Model 5: Mixed effects model for singulars. Effects for factors Definiteness (Definite/Indefinite) Plurals x Group (Adults/Children) (random effect structure: participants)

|  | ***Estimate*** | ***Standard error*** | ***z-value*** | ***p*** |
| --- | --- | --- | --- | --- |
| Intercept (Adults *le*) | -5.777 | 1.504 | -3.841 | < 0. 001 *** |
| Indef - *un* | 3.401 | 1.250 | 2.721 | 0. 0065 ** |
| Group - *children* | 0.230 | 1.572 | 0.146 | 0. 884 |
| Def - un * Group - children | 0.541 | 1.367 | 0.396 | 0. 692 |

*Log Likelihood: -152.4; Number of observations: 495*

Model 6: Analysis of deviance table (Type III Wald Chi-square tests) for singulars. Effects for factors Definiteness (Definite/Indefinite) Plurals x Group (Adults/Children) (random effect structure: participants)

|  | ***Chi-square*** | ***Df*** | ***p*** |
| --- | --- | --- | --- |
| Intercept | 14.755 | 1 | < 0. 001 *** |
| Def | 7.405 | 1 | 0. 0065 ** |
| Group | 0.021 | 1 | 0. 884 |
| Def*Group | 0.157 | 1 | 0. 692 |
